# Supplementary material for: Simple synthesis of tetra-n-butylphosphonium benzimidazolate/benzimidazole mixture as a thermally stable proton conductor
Source: Royal Society of Chemistry journal article supplement (doi:10.1039/c0cc03170d), 2011-01-01
Supplement: c0cc03170d.pdf [file c0cc03170d.pdf]

## Electronic Supplementary Information

Simple synthesis of tetra-*n*-butylphosphonium benzimidazolate/benzimidazole mixture as a thermally stable proton conductor

Yuki Tsuji, Tomonobu Mizumo, and Hiroyuki Ohno\*

### Preparation of ionic liquids and mixture with benzimidazole

Aqueous solution of [P<sub>4444</sub>][OH] (a donation from Hokko Chemical) and reagent grade BzIm (Tokyo Chemical Industry Co., Ltd.) were used without further purification. Equimolar amounts of [P<sub>4444</sub>][OH] and BzIm were mixed slowly in methanol under an atmosphere of nitrogen and stirred on an ice bath, so as to prepare the tetra-*n*-butylphosphonium benzimidazolate ([P<sub>4444</sub>][BzIm]) after drying (Scheme 1). A similar process was used to prepare the [P<sub>4444</sub>][BzIm]/(BzIm)<sub>x</sub> mixture (x=0.2-3.0) with differing BzIm fractions in order to analyze the proton conductive property. The water content of these mixtures was analysed using a Karl-Fischer moisture titrator (MKS-210, Kyoto Electronics Manufacturing Co.).

### Characterization

The structure of [P<sub>4444</sub>][BzIm] and of the [P<sub>4444</sub>][BzIm]/(BzIm)<sub>x</sub> mixture was confirmed by <sup>1</sup>H-NMR measurement. The NMR charts for BzIm and [P<sub>4444</sub>][BzIm] is shown in Fig. S1. The shifts of proton peaks strongly suggest the formation of salts.

- BzIm (400MHz, d<sub>6</sub>-DMSO)  
δ=7.2 (t, 2H), 7.59 (t, 2H), 8.21 (s, 1H)
- [P<sub>4444</sub>][BzIm] (x=0) (400MHz, d<sub>6</sub>-DMSO)  
δ= 0.91 (t, 3H), 1.42 (m, 4H), 2.17 (t, 3H), 6.67 (t, 2H), 7.28 (t, 2H), 7.61 (s, 1H)
- [P<sub>4444</sub>][BzIm]/(BzIm)<sub>0.2</sub> (400MHz, d<sub>6</sub>-DMSO)  
δ= 0.91 (t, 3H), 1.41 (m, 4H), 2.15 (t, 3H), 6.76 (t, 2H), 7.33 (t, 2H), 7.73 (s, 1H)
- [P<sub>4444</sub>][BzIm]/(BzIm)<sub>0.5</sub> (400MHz, d<sub>6</sub>-DMSO)  
δ= 0.90 (t, 3H), 1.42 (m, 4H), 2.17 (t, 3H), 6.82 (t, 2H), 7.39 (t, 2H), 7.82 (s, 1H)
- [P<sub>4444</sub>][BzIm]/(BzIm)<sub>1.0</sub> (400MHz, d<sub>6</sub>-DMSO)  
δ= 0.91 (t, 3H), 1.41 (m, 4H), 2.13 (t, 3H), 6.92 (t, 2H), 7.44 (t, 2H), 7.94 (s, 1H)
- [P<sub>4444</sub>][BzIm]/(BzIm)<sub>2.0</sub> (400MHz, d<sub>6</sub>-DMSO)  
δ= 0.90 (t, 3H), 1.38 (m, 4H), 2.13 (t, 3H), 7.03 (t, 2H), 7.52 (t, 2H), 8.10 (s, 1H)
- [P<sub>4444</sub>][BzIm]/(BzIm)<sub>3.0</sub> (400MHz, d<sub>6</sub>-DMSO)  
δ= 0.91 (t, 3H), 1.42 (m, 4H), 2.15 (t, 3H), 7.06 (t, 2H), 7.52 (t, 2H), 8.09 (s, 1H)

Elemental analysis: calcd for C<sub>23</sub>H<sub>41</sub>N<sub>6</sub>P<sub>3</sub> 1/3 H<sub>2</sub>O: C:72.21; H:10.98; N:7.32. Found C:72.54; H:11.19; N:7.11. This [P<sub>4444</sub>][BzIm] salt is very hygroscopic and is quite difficult to get a stable data. The elemental analysis gives the data for the [P<sub>4444</sub>][BzIm] containing small amount of water.

### Conductivity and measurements

The thermal properties of these samples were studied by differential scanning calorimetry (DSC: Seiko Instruments, DSC-120) and by thermogravimetric analysis (TG/DTA: Seiko Instruments, TGDTA-220). The viscosity of the samples was measured by a Brookfield viscometer, DV-1+.

Ionic conductivity was measured by the AC impedance method using a Schlumberger Solartron 1260 impedance/gain-phase analyzer. The impedance of the samples was measured from 10Hz to 1MHz with temperature scanning at 2 °C min<sup>-1</sup> from 10 °C to 120 °C. Chronoamperometric measurements were also made to confirm the proton conduction in the [P<sub>4444</sub>][BzIm]/(BzIm)<sub>x</sub> mixture. A steady-state current should be observed as a result of the electrolytic reduction of protons transported in the matrix.

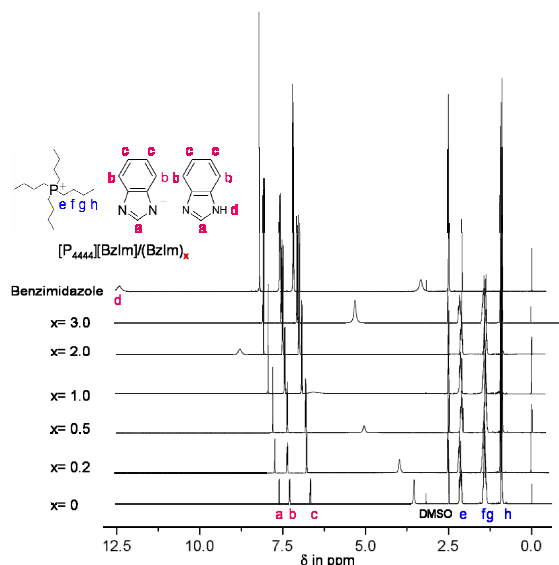

Fig. S1 <sup>1</sup>H-NMR charts of benzimidazole and mixtures with salts.
